# Supplementary material
Source: MDPI journal article supplement (https://www.mdpi.com/2227-9717/12/3/626)
Supplement: s1 [file s1]

# A Molecularly Imprinted Fluorescence Sensor Based on Upconversion-Nanoparticle-Grafted Covalent Organic Frameworks for Specific Detection of Methimazole

Yan Liu, Tian Zhao, Shuzhen Li, Yichuan Cao and Guozhen Fang \*

## 1. Validation by HPLC

For HPLC analysis, the pretreatment process and sample analysis procedures of pork and milk were executed in conformity to the Chinese National Standard (GB/T 22990–2008) [1].

**Table S1.** Optimization of additional amount of COFs.

| Polymer          | Dosage(mg) | F <sub>0</sub> /F(MIP) | F <sub>0</sub> /F(NIP) | IF    |
|------------------|------------|------------------------|------------------------|-------|
| MIP <sub>1</sub> | 1          | 1.331                  | 1.137                  | 2.416 |
| MIP <sub>2</sub> | 1.5        | 1.164                  | 1.062                  | 2.645 |
| MIP <sub>3</sub> | 2          | 1.181                  | 1.123                  | 1.472 |
| MIP <sub>4</sub> | 2.5        | 1.193                  | 1.115                  | 1.678 |

**Table S2.** Optimization of the molar ratio of MMZ to AM to MAA to EGDMA.

| Polymer          | Molar ratio | F <sub>0</sub> /F(MIP) | F <sub>0</sub> /F(NIP) | IF    |
|------------------|-------------|------------------------|------------------------|-------|
| MIP <sub>1</sub> | 1:4:4:6     | 1.185                  | 1.101                  | 1.832 |
| MIP <sub>2</sub> | 1:4:4:8     | 1.225                  | 1.091                  | 2.473 |
| MIP <sub>3</sub> | 1:4:4:10    | 1.104                  | 1.053                  | 1.962 |

**Table S3.** Optimization of the matrix of tests.

| Polymer          | Matrix       | $F_0/F(\text{MIP})$ | $F_0/F(\text{NIP})$ | IF    |
|------------------|--------------|---------------------|---------------------|-------|
| MIP <sub>1</sub> | Methanol     | 1.297               | 1.132               | 2.25  |
| MIP <sub>2</sub> | Ethanol      | 1.217               | 1.125               | 1.736 |
| MIP <sub>3</sub> | Acetonitrile | 1.232               | 1.123               | 1.886 |

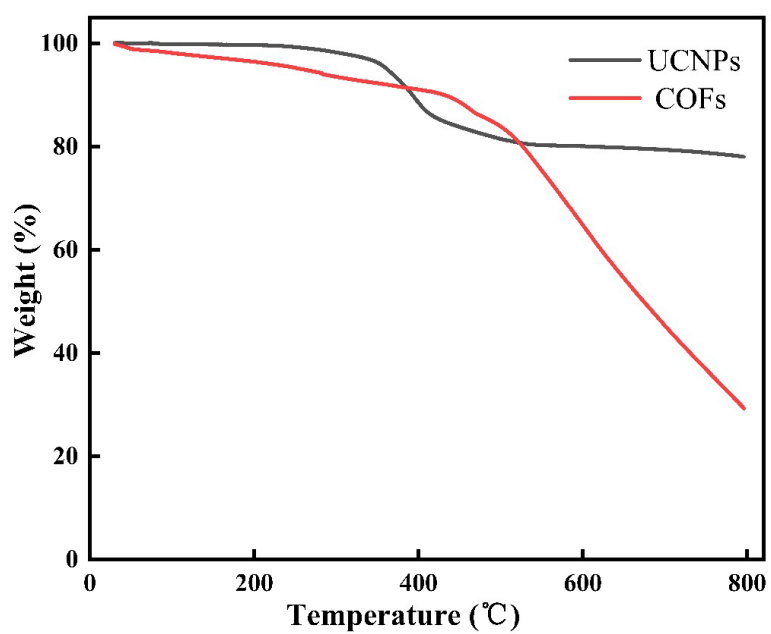

**Figure S1.** TGA curves of UCNPs, COFs.

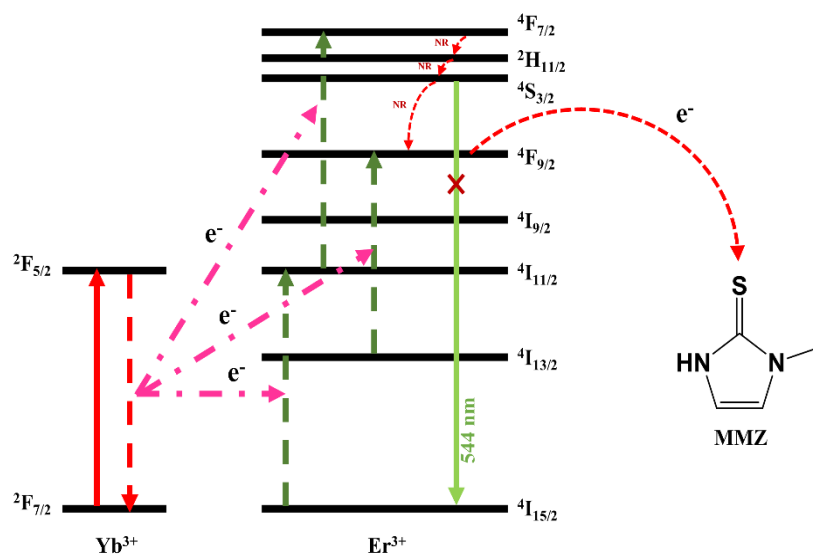

**Figure S2.** The energy transfer principle.

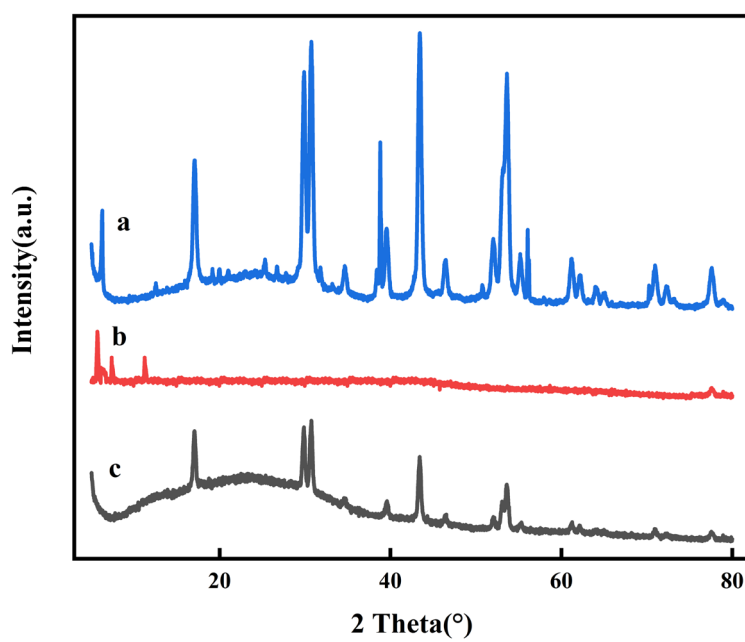

**Figure S3.** XRD curves of UCNPs (a), COFs (b), UCNPs-grafted COFs@MIPs (c).

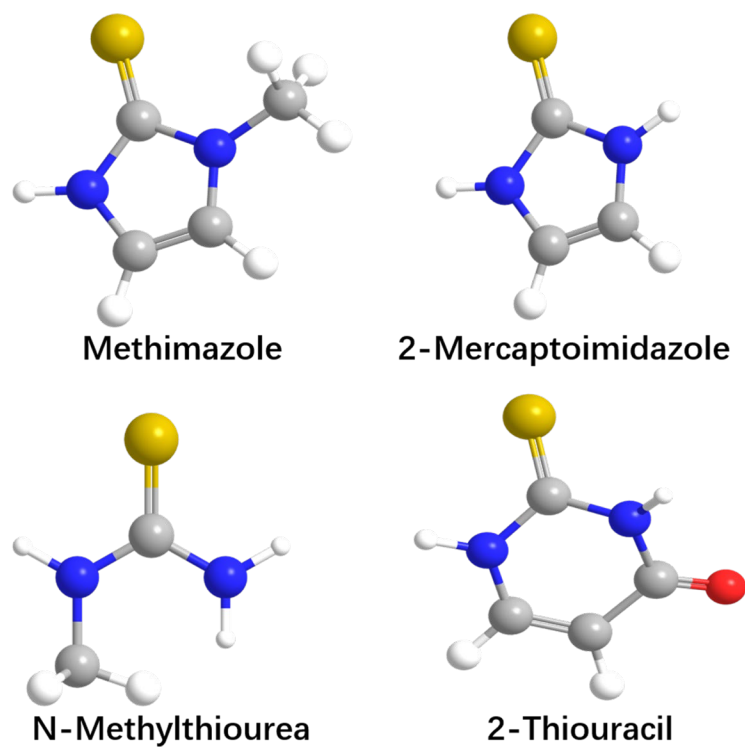

**Figure S4.** The chemical structures of methimazole (MMZ), 2-mercaptoimidazole (MZY), N-methylthiourea (Metu) and 2-thiouracil (2-TU).

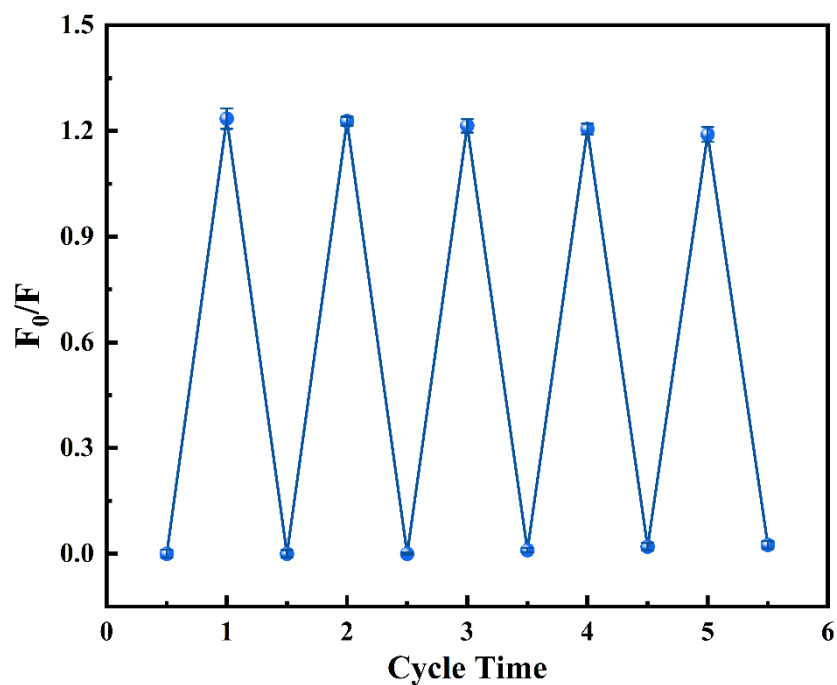

**Figure S5.** Reusability of UCNPs-grafted COFs@MIPs for the determination of MMZ.

1 **Table S4.** The comparison of the analytical methods with other reported methods.

2

| Analytical method          | Linear range<br>( $\mu\text{g L}^{-1}$ ) | LOD ( $\mu\text{g L}^{-1}$ ) | Recovery (%) | Reference |
|----------------------------|------------------------------------------|------------------------------|--------------|-----------|
| MIP QCM sensor             | $0.5\text{-}20\times 10^3$               | 109                          | 84.4-91.7    | [2]       |
| ECL                        | $0.5\text{-}6\times 10^3$                | 48                           | 87.8-101.8   | [3]       |
| HPLC                       | $0.23\text{-}1.14\times 10^3$            | 110                          | 97-102       | [4]       |
| N-CQDs                     | $0.34\text{-}6.85\times 10^3$            | $9.13\times 10^{-2}$         | 99-102       | [5]       |
| Aptamer                    | 1.71-857.14                              | 2.13                         | 81.54-100.96 | [6]       |
| ELISA                      | 2.5-40                                   | 1.56-2.72                    | 81.25-103.19 | [7]       |
| UCNPs grafted<br>COFs@MIPs | $0.05\text{-}3\times 10^3$               | 3                            | 88.24-91.54  | This work |

## References

1. Hu, X.; Guo, Y.; Zhang, J.; Wang, X.; Fang, G.; Wang, S. A signal-amplified ratiometric fluorescence biomimetic sensor based on the synergistic effect of IFE and AE for the visual smart monitoring of oxytetracycline. *Chemical Engineering Journal* **2022**, *433*, 134499, doi:<https://doi.org/10.1016/j.cej.2022.134499>.
2. Pan, M.; Fang, G.; Lu, Y.; Kong, L.; Yang, Y.; Wang, S. Molecularly imprinted biomimetic QCM sensor involving a poly(amidoamine) dendrimer as a functional monomer for the highly selective and sensitive determination of methimazole. *Sensors and Actuators B: Chemical* **2015**, *207*, 588-595, doi:[10.1016/j.snb.2014.10.103](https://doi.org/10.1016/j.snb.2014.10.103).
3. Saleh, T.A.; Al-Shalalfeh, M.M.; Al-Saadi, A.A. Silver nanoparticles for detection of methimazole by surface-enhanced Raman spectroscopy. *Materials Research Bulletin* **2017**, *91*, 173-178, doi:[10.1016/j.materresbull.2017.03.041](https://doi.org/10.1016/j.materresbull.2017.03.041).
4. Zakrzewski, R. Determination of methimazole in urine with the iodine-azide detection system following its separation by reversed-phase high-performance liquid chromatography. *J Chromatogr B Analyt Technol Biomed Life Sci* **2008**, *869*, 67-74, doi:[10.1016/j.jchromb.2008.05.021](https://doi.org/10.1016/j.jchromb.2008.05.021).
5. Yu, C.; Qin, D.; Jiang, X.; Zheng, X.; Deng, B. Facile synthesis of bright yellow fluorescent nitrogen-doped carbon quantum dots and their applications to an off-on probe for highly sensitive detection of methimazole. *Microchemical Journal* **2021**, *168*, doi:[10.1016/j.microc.2021.106480](https://doi.org/10.1016/j.microc.2021.106480).

6. Xie, M.; Chen, Z.; Zhao, F.; Lin, Y.; Zheng, S.; Han, S. Selection and Application of ssDNA Aptamers for Fluorescence Biosensing Detection of Malachite Green. *Foods* 2022, *11*, doi:10.3390/foods11060801.
7. Yin, X.; Li, H.; Wu, S.; Lu, Y.; Yang, Y.; Qin, L.; Li, L.; Xiao, J.; Liang, J.; Si, Y.; et al. A sensitive and specific enzyme-linked immunosorbent assay for the detection of pymetrozine in vegetable, cereal, and meat. *Food Chemistry* 2023, *418*, 135949, doi:10.1016/j.foodchem.2023.135949.
